# Supplementary material
Source: Research Square preprint supplement (doi:10.21203/rs.3.rs-8743428/v1)
Supplement: Supplementary file 1 [file 7217ba6ef7ead4394bb8a761.pdf]

# Supporting Information for manuscript “Re-melting continental roots”

M Klöcking, A Stracke, AW Lanati, JJ Shea, F Genske, M Böhnke,  
Z Liu & V Salters

## **Contents**

|          |                                           |          |
|----------|-------------------------------------------|----------|
| <b>1</b> | <b>Supplementary Figures</b>              | <b>2</b> |
| <b>2</b> | <b>Data Sources of GEOROC Compilation</b> | <b>3</b> |

# 1 Supplementary Figures

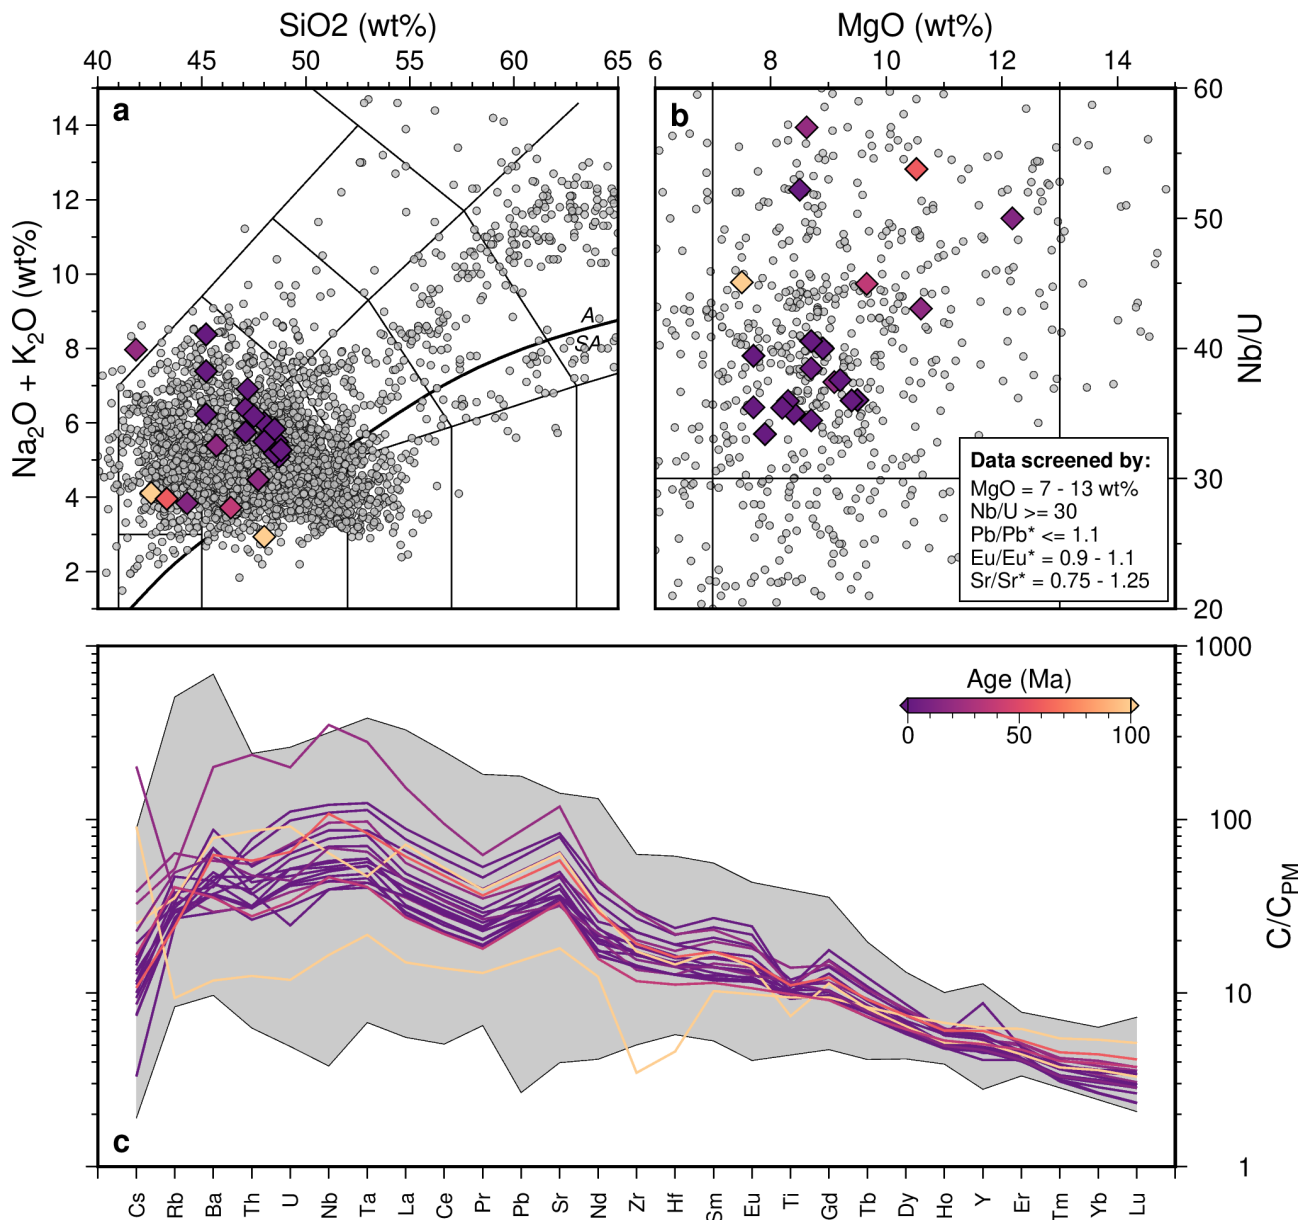

Figure 1: Geochemical characteristics of screened dataset. a) Total-alkali vs. silica diagram; large diamonds = screened samples coloured by age; small grey circles = distribution of existing east Australian samples from ref.<sup>1</sup>. The majority of samples are alkaline and fall in the alkali basalt and basanite fields. b) MgO against Nb/U to illustrate data screening process. Full screening criteria are summarized in inset. Symbols as in a). c) Trace element distribution of screened dataset, coloured by age and normalized to primitive mantle composition (PM)<sup>2</sup>. Grey polygon = distribution of all mafic east Australian samples ( $\text{MgO} > 7$  wt%)<sup>1</sup>.

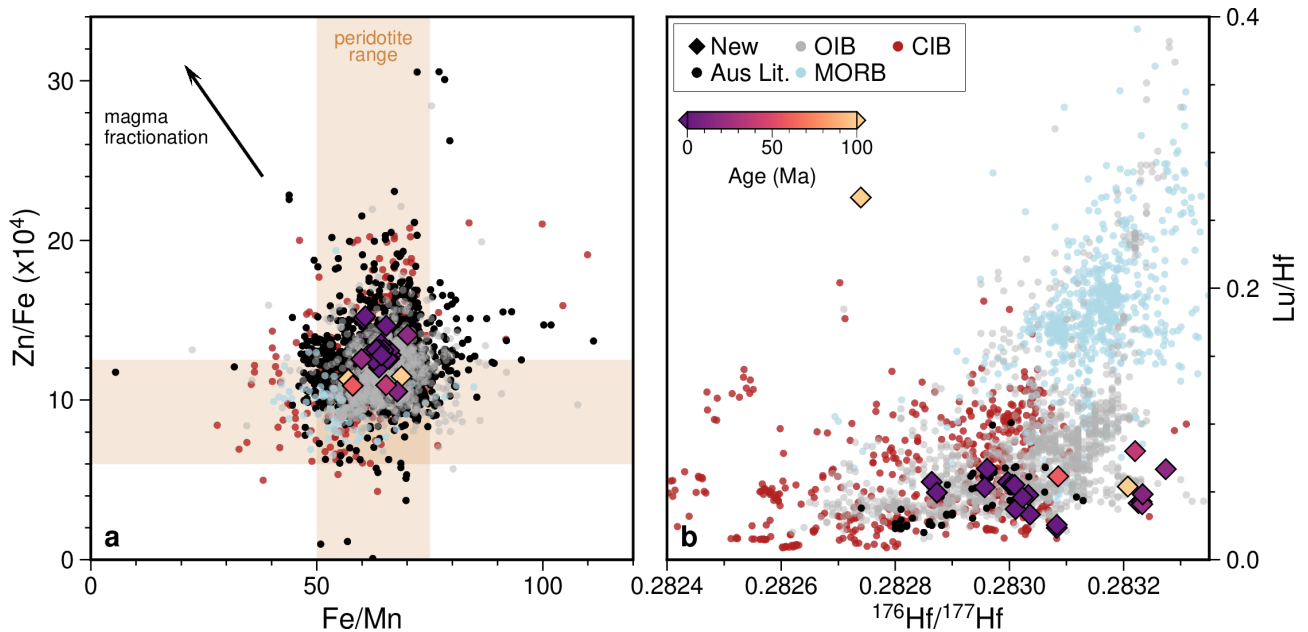

Figure 2: Discrimination of mantle sources. a) Zn/Fe vs. Fe/Mn to distinguish the influence of olivine-orthopyroxene versus clinopyroxene dominated source mantle (peridotite versus pyroxenite). Large diamonds = screened samples coloured by age; black circles = existing east Australian data<sup>3,1</sup>; grey/blue circles = ocean island basalts (OIB) and mid oceanic ridge basalts (MORB)<sup>4</sup>; red circles = continental intraplate basalts from GEOROC (see Section 2 for data sources); all datasets are screened for MgO > 7 wt%. Tan polygons = approximate peridotite compositional range<sup>5,6</sup>. b) Lu/Hf vs.  $^{176}\text{Hf}/^{177}\text{Hf}$ , symbols as in a). Samples from this study have constant Lu/Hf ratios that do not vary with Hf isotopic composition.

## 2 Data Sources of GEOROC Compilation

We have compiled global volcanic Hf isotope compositions from the GEOROC database (<https://georoc.eu>; version 2025-09-01). The compilation was generated with the “Chemistry” query option (abundances), using the following filters: HF176\_HF177  $\geq$  0; material: whole-rock (and volcanic glass); rock type: volcanic rock; for all geological settings. All chemical variables were included for download, combined by “OR”, as well as all metadata. Note that, as a consequence of combining data by “OR”, this dataset may contain multiple analyses for the same sample.

This compilation was subsequently filtered to only include samples where an initial  $^{176}\text{Hf}/^{177}\text{Hf}$  ratio was reported or that are younger than 10 Ma. In addition, reported iron oxide values were recalculated to  $\text{FeO}_T$  for all samples and samples from the following tectonic settings were excluded: ocean island, seamount, submarine ridge and convergent margin. The final dataset comprised 1,036 samples from 87 publications as cited below. The data files and python filtering script are archived in ref.<sup>7</sup>.

## References

- [1] Shea, J.J., Ezad, I.S., Foley, S.F., Lanati, A.W.: The Eastern Australian Volcanic Province, its primitive melts, constraints on melt sources and the influence of mantle metasomatism. *Earth-Science Reviews* **233**, 104168 (2022) <https://doi.org/10.1016/j.earscirev.2022.104168>
- [2] McDonough, W.F., Sun, S.-s.: The composition of the Earth. *Chemical Geology* **120**(3-4), 223–253 (1995) [https://doi.org/10.1016/0009-2541\(94\)00140-4](https://doi.org/10.1016/0009-2541(94)00140-4)
- [3] Ball, P.W., Czarnota, K., White, N.J., Klöcking, M., Davies, D.R.: Thermal Structure of Eastern Australia’s Upper Mantle and its Relationship to Cenozoic Volcanic Activity and Dynamic Topography. *Geochemistry, Geophysics, Geosystems* **22**, 2021–009717 (2021) <https://doi.org/10.1029/2021GC009717>
- [4] Stracke, A., Willig, M., Genske, F., Béguelin, P., Todd, E.: Chemical Geodynamics Insights From a Machine Learning Approach. *Geochemistry, Geophysics, Geosystems* **23**(10) (2022) <https://doi.org/10.1029/2022GC010606>
- [5] Le Roux, V., Lee, C.T.A., Turner, S.J.: Zn/Fe systematics in mafic and ultramafic systems: Implications for detecting major element heterogeneities in the Earth’s mantle. *Geochimica et Cosmochimica Acta* **74**(9), 2779–2796 (2010) <https://doi.org/10.1016/J.GCA.2010.02.004>
- [6] Rudzitis, S., Reid, M.R., Blichert-Toft, J.: On edge melting under the Colorado Plateau margin. *Geochemistry, Geophysics, Geosystems* **17**(7), 2835–2854 (2016) <https://doi.org/10.1002/2016gc006349>
- [7] Klöcking, M., Stracke, A.: Software for ‘Re-melting continental roots’. Zenodo (DOI tbc) (2026). [https://github.com/mk618/peridotite\\_depletion-refertilisation](https://github.com/mk618/peridotite_depletion-refertilisation)
- [8] Agra, N.A., Elburg, M.A., Vorster, C.: Constraints on Paleoproterozoic crustal growth from Birimian Supergroup lavas of the Bui belt (Ghana) in the West African Craton. *Precambrian Research* **384**, 106926 (2023) <https://doi.org/10.1016/j.precamres.2022.106926>
- [9] Aktağ, A., Sayit, K., Peters, B.J., Furman, T., Rickli, J.: Trace element and Sr-Nd-Hf-Pb isotopic constraints on the composition and evolution of eastern Anatolian sub-lithospheric mantle. *Lithos* **430–431**, 106849 (2022) <https://doi.org/10.1016/j.lithos.2022.106849>
- [10] Aldanmaz, E., Pickard, M., Meisel, T., Altunkaynak, Ş., Sayit, K., Şen, P., Hanan, B.B., Furman, T.: Source components and magmatic processes in the genesis of Miocene to Quaternary lavas in western Turkey: constraints from HSE distribution and Hf–Pb–Os isotopes. *Contributions to Mineralogy and Petrology* **170**(2) (2015) <https://doi.org/10.1007/s00410-015-1176-x>
- [11] Andronikov, A.V., Mukasa, S.B.:  $^{40}\text{Ar}/^{39}\text{Ar}$  eruption ages and geochemical characteristics of Late Tertiary to Quaternary intraplate and arc-related lavas in interior Alaska. *Lithos* **115**(1–4), 1–14 (2010) <https://doi.org/10.1016/j.lithos.2009.11.002>
- [12] Bertrand, H., Chazot, G., Blichert-Toft, J., Thoral, S.: Implications of widespread high- $\mu$  volcanism on the Arabian Plate for Afar mantle plume and lithosphere composition. *Chemical Geology* **198**(1–2), 47–61 (2003) [https://doi.org/10.1016/s0009-2541\(02\)00418-7](https://doi.org/10.1016/s0009-2541(02)00418-7)

- [13] Bosch, D., Maury, R.C., El Azzouzi, M., Bollinger, C., Bellon, H., Verdoux, P.: Lithospheric origin for Neogene–Quaternary Middle Atlas lavas (Morocco): Clues from trace elements and Sr–Nd–Pb–Hf isotopes. *Lithos* **205**, 247–265 (2014) <https://doi.org/10.1016/j.lithos.2014.07.009>
- [14] Bragagni, A., Mastroianni, F., Münker, C., Conticelli, S., Avanzinelli, R.: A carbon-rich lithospheric mantle as a source for the large CO<sub>2</sub> emissions of Etna volcano (Italy). *Geology* **50**(4), 486–490 (2022) <https://doi.org/10.1130/g49510.1>
- [15] Brandl, P.A., Genske, F.S., Beier, C., Haase, K.M., Sprung, P., Krumm, S.H.: Magmatic Evidence for Carbonate Metasomatism in the Lithospheric Mantle underneath the Ohře (Eger) Rift. *Journal of Petrology* **56**(9), 1743–1774 (2015) <https://doi.org/10.1093/petrology/egv052>
- [16] Brlek, M., Richard Tapster, S., Schindlbeck-Belo, J., Gaynor, S.P., Kutterolf, S., Hauff, F., Georgiev, S.V., Trinajstić, N., Šuica, S., Brčić, V., Wang, K.-L., Lee, H.-Y., Beier, C., Abersteiner, A.B., Mišur, I., Peytcheva, I., Kukoč, D., Németh, B., Trajanova, M., Balen, D., Guillong, M., Szymanowski, D., Lukács, R.: Tracing widespread Early Miocene ignimbrite eruptions and petrogenesis at the onset of the Carpathian-Pannonian Region silicic volcanism. *Gondwana Research* **116**, 40–60 (2023) <https://doi.org/10.1016/j.gr.2022.12.015>
- [17] Chen, S.-S., Fan, W.-M., Shi, R.-D., Xu, J.-F., Yang, K., Pan, Z.: Early Cretaceous volcanic rocks in Yunzhug area, central Tibet, China, associated with arc–continent collision in the Tibetan Plateau? *Lithos* **380–381**, 105827 (2021) <https://doi.org/10.1016/j.lithos.2020.105827>
- [18] Cheng, T., Nebel, O., Sossi, P.A., Wu, J., Siebel, W., Chen, F.K., Nebel-Jacobsen, Y.J.: On the Sr–Nd–Pb–Hf isotope code of enriched, Dupal-type sub-continental lithospheric mantle underneath south-western China. *Chemical Geology* **489**, 46–60 (2018) <https://doi.org/10.1016/j.chemgeo.2018.05.018>
- [19] Choi, E., Fiorentini, M.L., Giuliani, A., Foley, S.F., Maas, R., Graham, S.: Petrogenesis of Proterozoic alkaline ultramafic rocks in the Yilgarn Craton, Western Australia. *Gondwana Research* **93**, 197–217 (2021) <https://doi.org/10.1016/j.gr.2021.01.011>
- [20] Choi, H.-O., Choi, S.H., Yu, Y.: Isotope geochemistry of Jeongok basalts, northernmost South Korea: Implications for the enriched mantle end-member component. *Journal of Asian Earth Sciences* **91**, 56–68 (2014) <https://doi.org/10.1016/j.jseaes.2014.05.010>
- [21] Choi, S.H., Suzuki, K., Mukasa, S.B., Lee, J.-I., Jung, H.: Lu–Hf and Re–Os systematics of peridotite xenoliths from Spitsbergen, western Svalbard: Implications for mantle–crust coupling. *Earth and Planetary Science Letters* **297**(1–2), 121–132 (2010) <https://doi.org/10.1016/j.epsl.2010.06.013>
- [22] Chu, Z.-Y., Harvey, J., Liu, C.-Z., Guo, J.-H., Wu, F.-Y., Tian, W., Zhang, Y.-L., Yang, Y.-H.: Source of highly potassic basalts in northeast China: Evidence from Re–Os, Sr–Nd–Hf isotopes and PGE geochemistry. *Chemical Geology* **357**, 52–66 (2013) <https://doi.org/10.1016/j.chemgeo.2013.08.007>
- [23] Cosca, M.A., Reid, M., Delph, J.R., Kuşcu, G.G., Blichert-Toft, J., Premo, W., Whitney, D.L., Teyssier, C., Rojay, B.: Age and mantle sources of Quaternary basalts associated

- with “leaky” transform faults of the migrating Anatolia-Arabia-Africa triple junction. *Geosphere* **17**(1), 69–94 (2020) <https://doi.org/10.1130/ges02266.1>
- [24] Elkins, L.J., Meyzen, C.M., Callegaro, S., Marzoli, A., Bizimis, M.: Assessing Origins of End-Triassic Tholeiites From Eastern North America Using Hafnium Isotopes. *Geochemistry, Geophysics, Geosystems* **21**(6) (2020) <https://doi.org/10.1029/2020gc008999>
- [25] Eskandari, A., Deevsalar, R., De Rosa, R., Shinjo, R., Donato, P., Neill, I.: Geochemical and isotopic constraints on the evolution of magma plumbing system at Damavand Volcano, N Iran. *Lithos* **354–355**, 105274 (2020) <https://doi.org/10.1016/j.lithos.2019.105274>
- [26] Fagundes, M.B., Santos, A., Geraldés, M., Castro Valente, S., Caitano, G.R., Viana Rocha-Júnior, E.R.: Petrogenesis, magmatic evolution of the Morro de São João Alkaline Massif, southeastern Brazil, and implications for the evolution of the South American Platform. *Journal of South American Earth Sciences* **156**, 105456 (2025) <https://doi.org/10.1016/j.jsames.2025.105456>
- [27] Fan, H., Zhang, M., Huang, F., Xu, J., Liu, X., Zeng, Y., Zhang, S., Liu, Q., Lv, M., Yu, H., Tian, Y., Zhang, L., Zhou, T., Li, Z., Zhang, Y.: Subducted oceanic plateau fed crustal growth: Insights from Amdo dacites in central Tibetan Plateau. *Lithos* **434–435**, 106944 (2022) <https://doi.org/10.1016/j.lithos.2022.106944>
- [28] Fan, Q.-C., Chen, S.-S., Zhao, Y.-W., Zou, H.-B., Li, N., Sui, J.-L.: Petrogenesis and evolution of Quaternary basaltic rocks from the Wulanhada area, North China. *Lithos* **206–207**, 289–302 (2014) <https://doi.org/10.1016/j.lithos.2014.08.007>
- [29] Fitzpayne, A., Giuliani, A., Howarth, G.H., Peters, B.J., Fehr, M.A., Maas, R.: Major-, trace-element and Sr-Nd-Hf isotope geochemistry of diamondiferous dykes from Tonguma and Koidu, Sierra Leone: Highly micaceous kimberlites formed by assimilation of metasomatised lithospheric mantle rocks. *Chemical Geology* **630**, 121475 (2023) <https://doi.org/10.1016/j.chemgeo.2023.121475>
- [30] Furman, T., Hanan, B.B., Sjöblom, M.P., Kürkcüoğlu, B., Sayit, K., Şen, E., Şen, P.A., Yürür, T.: Evolution of mafic lavas in Central Anatolia: Mantle source domains. *Geosphere* **17**(6), 1631–1646 (2021) <https://doi.org/10.1130/ges02329.1>
- [31] Gall, H., Furman, T., Hanan, B., Kürkcüoğlu, B., Sayit, K., Yürür, T., Sjöblom, M.P., Şen, E., Şen, P.A.: Post-delamination magmatism in south-central Anatolia. *Lithos* **398–399**, 106299 (2021) <https://doi.org/10.1016/j.lithos.2021.106299>
- [32] Gao, J.-F., Zhou, M.-F., Robinson, P.T., Wang, C.Y., Zhao, J.-H., Malpas, J.: Magma mixing recorded by Sr isotopes of plagioclase from dacites of the Quaternary Tengchong volcanic field, SE Tibetan Plateau. *Journal of Asian Earth Sciences* **98**, 1–17 (2015) <https://doi.org/10.1016/j.jseaes.2014.10.036>
- [33] Gong, N., Zhang, S.-Q., Qi, H., Yuan, G.-L., Li, J., Wang, G.-H., Liang, X., Liu, Z.-B.: Two-stage Mesozoic oceanic subduction and related mantle metasomatism beneath the South Qiangtang terrane with implications for post-collisional magmatism. *Gondwana Research* **136**, 219–235 (2024) <https://doi.org/10.1016/j.gr.2024.09.001>
- [34] Grosch, E.G., Ndlela, S., Murphy, D., McLoughlin, N., Trubac, J., Slama, J.: Geochemistry of mafic-ultramafic rocks of the 3.33 Ga Kromberg type-section, Barberton greenstone belt, South Africa: Implications for early Earth geodynamic processes. *Chemical Geology* **605**, 120947 (2022) <https://doi.org/10.1016/j.chemgeo.2022.120947>

- [35] Guo, P., Niu, Y., Ye, L., Liu, J., Sun, P., Cui, H., Zhang, Y., Gao, J., Su, L., Zhao, J., Feng, Y.: Lithosphere thinning beneath west North China Craton: Evidence from geochemical and Sr–Nd–Hf isotope compositions of Jining basalts. *Lithos* **202–203**, 37–54 (2014) <https://doi.org/10.1016/j.lithos.2014.04.024>
- [36] Guo, Z., Zou, H.: Decoupled whole-rock and zircon Hf isotopes in young evolved post-collisional lavas from Dayingshan (SE Tibet): Evidence for open-system magmatic processes. *Lithos* **400–401**, 106393 (2021) <https://doi.org/10.1016/j.lithos.2021.106393>
- [37] Huang, F., Li, J., Xu, J., Zeng, Y.: Sediment melts impart extremely light Mo isotopes to arc magmas of central Tibet. *Chemical Geology* **676**, 122610 (2025) <https://doi.org/10.1016/j.chemgeo.2024.122610>
- [38] Huang, X., He, J., Zhao, J., Dou, J., Li, W., Hu, A., Liu, G., Ji, Y., Chen, F., Li, S.: Partial melting of multiple mantle domains underneath the Paleo-Tethyan cold subduction zone triggered by slab rollback. *Lithos* **464–465**, 107423 (2024) <https://doi.org/10.1016/j.lithos.2023.107423>
- [39] JOHNSON, J.S., GIBSON, S.A., THOMPSON, R.N., NOWELL, G.M.: Volcanism in the Vitim Volcanic Field, Siberia: Geochemical Evidence for a Mantle Plume Beneath the Baikal Rift Zone. *Journal of Petrology* **46**(7), 1309–1344 (2005) <https://doi.org/10.1093/petrology/egi016>
- [40] Jung, S., Pfänder, J.A., Nebel, O., Willbold, M., Hoernes, S., Berndt, J., Pack, A.: High-K andesites as witnesses of a continental arc system in the Western Alps, Italy: constraints from HFSE and Hf–Nd–Sr–Pb–O isotope systematics. *Contributions to Mineralogy and Petrology* **178**(2) (2023) <https://doi.org/10.1007/s00410-022-01983-w>
- [41] Jung, S.G., Choi, S.H., Ji, K.H., Ryu, J.-S., Lee, D.-C.: Geochemistry of volcanic rocks from Oldoinyo Lengai, Tanzania: Implications for mantle source lithology. *Lithos* **350–351**, 105223 (2019) <https://doi.org/10.1016/j.lithos.2019.105223>
- [42] Kheirkhah, M., Neill, I., Allen, M.B.: Petrogenesis of OIB-like basaltic volcanic rocks in a continental collision zone: Late Cenozoic magmatism of Eastern Iran. *Journal of Asian Earth Sciences* **106**, 19–33 (2015) <https://doi.org/10.1016/j.jseaes.2015.02.027>
- [43] Khumalo, K.B., Ashwal, L.D., Hayes, B., Iaccheri, L.M., Meintjes, P.G., Webb, S.J.: Neoproterozoic lavas of the Ventersdorp Large Igneous Province, South Africa: Sr–Nd–Hf isotopic and trace element evidence for a long-lived plume beneath a stationary African continent. *Earth-Science Reviews* **252**, 104752 (2024) <https://doi.org/10.1016/j.earscirev.2024.104752>
- [44] Lötter, F.J.P., Lenhardt, N., Viereck, L., Münker, C., Marien, C.S., Altigani, M.A.H.: The Quaternary monogenetic Bayuda Volcanic Field, Sudan – Insights into mantle and crustal processes during magma petrogenesis. *Lithos* **410–411**, 106563 (2022) <https://doi.org/10.1016/j.lithos.2021.106563>
- [45] Lei, M., Lustrino, M., Xu, J., Kang, Z., Guo, Z., Chen, J.: Miocene olivine leucites in southern Tibet: Implications for the recycling of carbonates into the mantle during continental subduction. *Chemical Geology* **644**, 121835 (2024) <https://doi.org/10.1016/j.chemgeo.2023.121835>

- [46] LeMasurier, W.E., Choi, S.H., Kawachi, Y., Mukasa, S.B., Rogers, N.W.: Evolution of pantellerite-trachyte-phonolite volcanoes by fractional crystallization of basanite magma in a continental rift setting, Marie Byrd Land, Antarctica. *Contributions to Mineralogy and Petrology* **162**(6), 1175–1199 (2011) <https://doi.org/10.1007/s00410-011-0646-z>
- [47] Liu, J., Chen, L., Wang, X., Zhong, Y., Yu, X., Zeng, G., Erdmann, S.: The role of melt-rock interaction in the formation of Quaternary high-MgO potassic basalt from the Greater Khingan Range, northeast China. *Journal of Geophysical Research: Solid Earth* **122**(1), 262–280 (2017) <https://doi.org/10.1002/2016jb013605>
- [48] Liu, P., Liu, X., Xiao, W., Zhang, Z., Xiao, Y., Song, Y., Wu, H.: Multiple ridge subduction processes in the southern Altaids: Implications from clinopyroxene chemistry and Sr–Nd–Hf isotopes of late carboniferous Nb-enriched, magnesian diorite-andesites in West Junggar, NW China. *Chemical Geology* **635**, 121600 (2023) <https://doi.org/10.1016/j.chemgeo.2023.121600>
- [49] Ma, L.-T., Dai, L.-Q., Hu, Y.-D., Zhao, Z.-F.: Origin of the coeval Nb-enriched and arc mafic igneous rocks: Implications for Paleozoic tectonic evolution of the Southwestern Tianshan. *Chemical Geology* **674**, 122582 (2025) <https://doi.org/10.1016/j.chemgeo.2024.122582>
- [50] Shafai Moghadam, H., Hoernle, K., Hauff, F., Garbe-Schönberg, D., Pfänder, J.A.: Geochemistry and petrogenesis of alkaline rear-arc magmatism in NW Iran. *Lithos* **412–413**, 106590 (2022) <https://doi.org/10.1016/j.lithos.2021.106590>
- [51] Moghadam, H.S., Li, Q.L., Kirchenbaur, M., Garbe-Schönberg, D., Lucci, F., Griffin, W.L., Ghorbani, G.: Geochemical and Isotopic Evolution of Late Oligocene Magmatism in Quchan, NE Iran. *Geochemistry, Geophysics, Geosystems* **22**(11) (2021) <https://doi.org/10.1029/2021gc009973>
- [52] Neill, I., Meliksetian, K., Allen, M.B., Navasardyan, G., Kuiper, K.: Petrogenesis of mafic collision zone magmatism: The Armenian sector of the Turkish–Iranian Plateau. *Chemical Geology* **403**, 24–41 (2015) <https://doi.org/10.1016/j.chemgeo.2015.03.013>
- [53] Nelson, W.R., Hanan, B.B., Graham, D.W., Shirey, S.B., Yirgu, G., Ayalew, D., Furman, T.: Distinguishing Plume and Metasomatized Lithospheric Mantle Contributions to Post-Flood Basalt Volcanism on the Southeastern Ethiopian Plateau. *Journal of Petrology* **60**(5), 1063–1094 (2019) <https://doi.org/10.1093/petrology/egz024>
- [54] O’Neil, J., Boyet, M., Carlson, R.W., Paquette, J.-L.: Half a billion years of reworking of Hadean mafic crust to produce the Nuvvuagittuq Eoarchean felsic crust. *Earth and Planetary Science Letters* **379**, 13–25 (2013) <https://doi.org/10.1016/j.epsl.2013.07.030>
- [55] Ogungbuyi, P.I., Janney, P.E., Harris, C.: Carbonatite, aillikite and olivine melilitite from Zandkopsdrift, Namaqualand, South Africa: Constraints on the origin of an unusual lamprophyre-dominated carbonatite complex and the nature of its mantle source. *Lithos* **418–419**, 106678 (2022) <https://doi.org/10.1016/j.lithos.2022.106678>
- [56] Pakulla, J.J., Jansen, M.W., Duraiswami, R.A., Gadpallu, P., Tusch, J., Jentzsch, C., Braukmüller, N., Wombacher, F., Münker, C.: Trace element and Sr–Nd–Hf–Pb isotope evidence for a multi-magma chamber system beneath the Deccan Volcanic Province, India. *Chemical Geology* **640**, 121749 (2023) <https://doi.org/10.1016/j.chemgeo.2023.121749>

- [57] Pandey, R., Singh, M.K., Pandey, A., Rao, N.V.C., Belyatsky, B.V.: Multi-stage enrichment in the mantle source region of cratonic lamproites: Geochemical and Sr-Nd-Hf-Os isotopic insights from the Mesoproterozoic lamproites of Bastar Craton, India. *Precambrian Research* **418**, 107676 (2025) <https://doi.org/10.1016/j.precamres.2025.107676>
- [58] Pang, K.-N., Chung, S.-L., Zarrinkoub, M.H., Li, X.-H., Lee, H.-Y., Lin, T.-H., Chiu, H.-Y.: New age and geochemical constraints on the origin of Quaternary adakite-like lavas in the Arabia–Eurasia collision zone. *Lithos* **264**, 348–359 (2016) <https://doi.org/10.1016/j.lithos.2016.08.042>
- [59] Paul, B., Hergt, J., Woodhead, J.: Mantle heterogeneity beneath the Cenozoic volcanic provinces of central Victoria inferred from trace-element and Sr, Nd, Pb and Hf isotope data. *Australian Journal of Earth Sciences* **52**(2), 243–260 (2005) <https://doi.org/10.1080/08120090500139448>
- [60] Prelević, D., Stracke, A., Foley, S.F., Romer, R.L., Conticelli, S.: Hf isotope compositions of Mediterranean lamproites: Mixing of melts from asthenosphere and crustally contaminated mantle lithosphere. *Lithos* **119**(3–4), 297–312 (2010) <https://doi.org/10.1016/j.lithos.2010.07.007>
- [61] Qi, J.-Y., Chen, S.-S., Cao, Y.-Y., Zhang, Z.: Petrogenesis and tectonic implications of late Permian andesites from Rongzharinian, northern Qiangtang, Tibet. *Journal of Asian Earth Sciences* **266**, 106125 (2024) <https://doi.org/10.1016/j.jseaes.2024.106125>
- [62] Rasoazanamparany, C., Widom, E., Kuentz, D., Raharimahefa, T., Rakotondravelo, K., Rakotondrazafy, A.M.F.: Geochemistry and mantle source characteristics of the Itasy volcanic field: Implications for the petrogenesis of basaltic magmas in intra-continental-rifts. *Geochimica et Cosmochimica Acta* **300**, 137–163 (2021) <https://doi.org/10.1016/j.gca.2021.02.025>
- [63] Rasoazanamparany, C., Widom, E., Valentine, G.A., Smith, E.I., Cortés, J.A., Kuentz, D., Johnsen, R.: Origin of chemical and isotopic heterogeneity in a mafic, monogenetic volcanic field: A case study of the Lunar Crater Volcanic Field, Nevada. *Chemical Geology* **397**, 76–93 (2015) <https://doi.org/10.1016/j.chemgeo.2015.01.004>
- [64] Ravindran, A., Mezger, K., Balakrishnan, S., Berndt, J., Ranjan, S., Upadhyay, D.: Formation of Paleo- to Meso-Archean continental crust in the western Dharwar Craton, India: Constraints from U-Pb zircon ages and Hf-Pb-Sr isotopes of granitoids and sedimentary rocks. *Chemical Geology* **615**, 121196 (2023) <https://doi.org/10.1016/j.chemgeo.2022.121196>
- [65] Reid, M.R., Schleiffarth, W.K., Cosca, M.A., Delph, J.R., Blichert-Toft, J., Cooper, K.M.: Shallow melting of MORB-like mantle under hot continental lithosphere, Central Anatolia. *Geochemistry, Geophysics, Geosystems* **18**(5), 1866–1888 (2017) <https://doi.org/10.1002/2016gc006772>
- [66] Rooney, T.O., Hanan, B.B., Graham, D.W., Furman, T., Blichert-Toft, J., Schilling, J.-G.: Upper Mantle Pollution during Afar Plume–Continental Rift Interaction. *Journal of Petrology* **53**(2), 365–389 (2011) <https://doi.org/10.1093/petrology/egr065>
- [67] Tappe, S., Ngwenya, N.S., Stracke, A., Romer, R.L., Glodny, J., Schmitt, A.K.: Plume–lithosphere interactions and LIP-triggered climate crises constrained by the origin of Karoo lamproites. *Geochimica et Cosmochimica Acta* **350**, 87–105 (2023) <https://doi.org/10.1016/j.gca.2023.04.008>

- [68] Sarkar, S., Dalton, H., Giuliani, A., Phillips, D., Graham Pearson, D., Nowell, G.M., Woodhead, J.D., Hergt, J., Maas, R., Lynton Jaques, A., Chalapathi Rao, N.V., Weiss, Y., Ghosh, S.: Extreme enriched-mantle (EM) compositions recorded by the Sr-Nd-Hf isotopes of global cratonic lamproites. *Geochimica et Cosmochimica Acta* **394**, 220–243 (2025) <https://doi.org/10.1016/j.gca.2025.02.014>
- [69] Simon, J.I., Weis, D., DePaolo, D.J., Renne, P.R., Mundil, R., Schmitt, A.K.: Assimilation of preexisting Pleistocene intrusions at Long Valley by periodic magma recharge accelerates rhyolite generation: rethinking the remelting model. *Contributions to Mineralogy and Petrology* **167**(1) (2014) <https://doi.org/10.1007/s00410-013-0955-5>
- [70] Sims, K.W.W., Blichert-Toft, J., Kyle, P.R., Pichat, S., Gauthier, P.-J., Blusztajn, J., Kelly, P., Ball, L., Layne, G.: A Sr, Nd, Hf, and Pb isotope perspective on the genesis and long-term evolution of alkaline magmas from Erebus volcano, Antarctica. *Journal of Volcanology and Geothermal Research* **177**(3), 606–618 (2008) <https://doi.org/10.1016/j.jvolgeores.2007.08.006>
- [71] Sprung, P., Schuth, S., Münker, C., Hoke, L.: Intraplate volcanism in New Zealand: the role of fossil plume material and variable lithospheric properties. *Contributions to Mineralogy and Petrology* **153**(6), 669–687 (2007) <https://doi.org/10.1007/s00410-006-0169-1>
- [72] Stelten, M.E., Cooper, K.M., Vazquez, J.A., Reid, M.R., Barfod, G.H., Wimpenny, J., Yin, Q.-z.: Magma mixing and the generation of isotopically juvenile silicic magma at Yellowstone caldera inferred from coupling  $^{238}\text{U}$ – $^{230}\text{Th}$  ages with trace elements and Hf and O isotopes in zircon and Pb isotopes in sanidine. *Contributions to Mineralogy and Petrology* **166**(2), 587–613 (2013) <https://doi.org/10.1007/s00410-013-0893-2>
- [73] Sun, Y., Ying, J., Zhou, X., Shao, J., Chu, Z., Su, B.: Geochemistry of ultrapotassic volcanic rocks in Xiaogulihe NE China: Implications for the role of ancient subducted sediments. *Lithos* **208–209**, 53–66 (2014) <https://doi.org/10.1016/j.lithos.2014.08.026>
- [74] Tappe, S., Budde, G., Stracke, A., Wilson, A., Kleine, T.: The tungsten-182 record of kimberlites above the African superplume: Exploring links to the core-mantle boundary. *Earth and Planetary Science Letters* **547**, 116473 (2020) <https://doi.org/10.1016/j.epsl.2020.116473>
- [75] Tappe, S., Stracke, A., Acken, D., Strauss, H., Luguet, A.: Origins of kimberlites and carbonatites during continental collision – Insights beyond decoupled Nd-Hf isotopes. *Earth-Science Reviews* **208**, 103287 (2020) <https://doi.org/10.1016/j.earscirev.2020.103287>
- [76] Viccaro, M., Nicotra, E., Millar, I.L., Cristofolini, R.: The magma source at Mount Etna volcano: Perspectives from the Hf isotope composition of historic and recent lavas. *Chemical Geology* **281**(3–4), 343–351 (2011) <https://doi.org/10.1016/j.chemgeo.2010.12.020>
- [77] Wang, J., Su, Y., Zheng, J., Belousova, E.A., Chen, M., Dai, H., Zhou, X.: Petrogenesis of early Carboniferous bimodal-type volcanic rocks from the Junggar Basin (NW China) with implications for Phanerozoic crustal growth in Central Asian Orogenic Belt. *Gondwana Research* **89**, 220–237 (2021) <https://doi.org/10.1016/j.gr.2020.10.008>

- [78] Xiang, Z., Yang, J., Yan, Q., Xia, L., Xia, W., White, J.D.L.: Petrogenesis of the Early-Middle Triassic high-Mg andesitic rocks in the southern margin of the South China Block: Implications for the convergence between the South China and Indochina Blocks. *Journal of Asian Earth Sciences* **232**, 104994 (2022) <https://doi.org/10.1016/j.jseaes.2021.104994>
- [79] Xiao, Y., Liu, X., Xiao, W., Gong, X., Wu, H., Song, Y., Zhang, Z., Liu, P.: Hot subduction in the southern Paleo-Asian Ocean: Insights from clinopyroxene chemistry and Sr–Nd–Hf–Pb isotopes of Carboniferous volcanics in West Junggar. *Geoscience Frontiers* **15**(1), 101716 (2024) <https://doi.org/10.1016/j.gsf.2023.101716>
- [80] Yu, S.-Y., Xu, Y.-G., Zhou, S.-H., Lan, J.-B., Chen, L.-M., Shen, N.-P., Zhao, J.-X., Feng, Y.-X.: Late Cenozoic basaltic lavas from the Changbaishan-Baoqing Volcanic Belt, NE China: Products of lithosphere-asthenosphere interaction induced by subduction of the Pacific plate. *Journal of Asian Earth Sciences* **164**, 260–273 (2018) <https://doi.org/10.1016/j.jseaes.2018.06.031>
- [81] Zeng, G., Chen, L.-H., Hofmann, A.W., Jiang, S.-Y., Xu, X.-S.: Crust recycling in the sources of two parallel volcanic chains in Shandong, North China. *Earth and Planetary Science Letters* **302**(3–4), 359–368 (2011) <https://doi.org/10.1016/j.epsl.2010.12.026>
- [82] Zeng, G., Chen, L.-H., Hofmann, A.W., Wang, X.-J., Liu, J.-Q., Yu, X., Xie, L.-W.: Nephelinites in eastern China originating from the mantle transition zone. *Chemical Geology* **576**, 120276 (2021) <https://doi.org/10.1016/j.chemgeo.2021.120276>
- [83] Zhang, J., Guo, P., Sun, P., Niu, Y., Xiao, Y., Vasconcelos, P.M.: Petrogenesis of the early Cretaceous intra-plate basalts from the Western North China Craton: Implications for the origin of the metasomatized cratonic lithospheric mantle. *Lithos* **380–381**, 105887 (2021) <https://doi.org/10.1016/j.lithos.2020.105887>
- [84] Zhang, T.-Y., Deng, J., Wang, M., Li, C., Zhang, L., Sun, W.: Geochemistry and genesis of the Nadun Nb-enriched arc basalt in the Duolong mineral district, western Tibet: Indication of ridge subduction. *Geoscience Frontiers* **13**(1), 101283 (2022) <https://doi.org/10.1016/j.gsf.2021.101283>
- [85] Zhang, X.-Z., Wang, Q., Kerr, A.C., Wei, G.-J., Qi, Y., Liu, Y., Yang, Y.-C.: Sediment recycling by continental subduction indicated by B–Hf–Pb–Nd isotopes from Miocene–Quaternary lavas in the northern margin of Tibet. *Lithos* **444–445**, 107109 (2023) <https://doi.org/10.1016/j.lithos.2023.107109>
- [86] Zhang, Y., Yu, K., Fan, T., Yue, Y., Wang, R., Jiang, W., Xu, S., Wang, Y.: Geochemistry and petrogenesis of Quaternary basalts from Weizhou Island, northwestern South China Sea: Evidence for the Hainan plume. *Lithos* **362–363**, 105493 (2020) <https://doi.org/10.1016/j.lithos.2020.105493>
- [87] Zhang, Z., Liu, X., Xiao, W., Xu, J.-F., Shi, Y., Gong, X., Hu, R., Liu, P., Song, Y., Xiao, Y., Zhang, Z., Li, R., Li, D.: Geochemistry and Sr–Nd–Hf–Pb isotope systematics of late Carboniferous sanukitoids in northern West Junggar, NW China: Implications for initiation of ridge-subduction. *Gondwana Research* **99**, 204–218 (2021) <https://doi.org/10.1016/j.gr.2021.07.008>

- [88] Zhou, H., Hoernle, K., Geldmacher, J., Hauff, F., Homrighausen, S., Garbe-Schönberg, D., Jung, S., Bindeman, I.: A HIMU volcanic belt along the SW African coast (~83–49 Ma): New geochemical clues to deep mantle dynamics from carbonatite and silica-undersaturated complexes in Namibia. *Lithos* **430–431**, 106839 (2022) <https://doi.org/10.1016/j.lithos.2022.106839>
- [89] Zhou, L., Su, Y.-P., Zheng, J.-P., Dai, H.-K., Ma, Q., Chen, X., Zhang, X.-H., Xiong, K., Niu, T.-Y., Tong, G.: Geochemical and thermodynamic constraints on the genesis of coexisting alkaline and tholeiitic basalts from Datong, North China: Implication for compositional diversity of continental intraplate basalts. *Chemical Geology* **659**, 122143 (2024) <https://doi.org/10.1016/j.chemgeo.2024.122143>
- [90] Zhou, M.-F., Robinson, P.T., Wang, C.Y., Zhao, J.-H., Yan, D.-P., Gao, J.-F., Malpas, J.: Heterogeneous mantle source and magma differentiation of quaternary arc-like volcanic rocks from Tengchong, SE margin of the Tibetan Plateau. *Contributions to Mineralogy and Petrology* **163**(5), 841–860 (2011) <https://doi.org/10.1007/s00410-011-0702-8>
- [91] Zhu, X., Chen, D., Ren, Y., Yang, M., Wang, C.: Late Silurian mafic and felsic magmatism in the South Qilian Belt, northern Tibet Plateau: Response to slab breakoff. *Lithos* **380–381**, 105860 (2021) <https://doi.org/10.1016/j.lithos.2020.105860>
- [92] Zou, H., Guo, Z.: Geochronology and petrogenesis of basaltic trachyandesites from Laogupo volcano (SE Tibetan Plateau): U-series and Sr-Nd-Hf-O isotope constraints. *Journal of Asian Earth Sciences* **277**, 106379 (2025) <https://doi.org/10.1016/j.jseaes.2024.106379>
- [93] Zou, H., Ma, M., Fan, Q., Xu, B., Li, S.-Q., Zhao, Y., King, D.T.: Genesis and open-system evolution of Quaternary magmas beneath southeastern margin of Tibet: Constraints from Sr-Nd-Pb-Hf isotope systematics. *Lithos* **272–273**, 278–290 (2017) <https://doi.org/10.1016/j.lithos.2016.12.012>
